# Supplementary material
Source: publisher figshare collection journal article supplement (https://acs.figshare.com/ndownloader/files/6523194)
Supplement: Supplementary file 1 [file 6523194]

## Supporting Information

### *Metabolomics Reveals Cryptic Interactive Effects of Species Interactions and Environmental Stress on Nitrogen and Sulfur Metabolism in Seagrass*

*Harald Hasler-Sheetal\*<sup>1,2,3</sup>, Max C.N. Castorani<sup>4</sup>, Ronnie N. Glud,<sup>1,2, 5, 6</sup> Donald E Canfield<sup>2</sup>,  
Marianne Holmer<sup>1</sup>*

<sup>1</sup>*Department of Biology, University of Southern Denmark, Denmark.*

<sup>2</sup>*Nordic Center for Earth Evolution (NordCEE), University of Southern Denmark, Denmark.*

<sup>3</sup>*VILLUM Center for Bioanalytical Sciences, University of Southern Denmark, Denmark.*

<sup>4</sup>*Marine Science Institute, University of California, Santa Barbara, USA.*

<sup>5</sup>*Scottish Association for Marine Science, Oban PA37 1QA, UK*

<sup>6</sup>*University of Aarhus, Arctic Research Centre, Aarhus, Denmark*

*\*Corresponding author*

*Email: hasler@biology.sdu.dk*

*Phone/fax: +45 65 50 84 66*

*Address: Nordic Center for Earth Evolution, Department of Biology, University of Southern Denmark, 5230 Odense, Denmark*

#### **Contents:**

S1 Detailed method description

Number of pages: 14

Number of tables: 3

Number of figures: 1

Number of references: 5

**S1 Experimental setup and specimen collection** Sandy sediment was collected from unvegetated sea bottom adjacent to seagrass meadows at Svenstrup Strand, Denmark (+55°28'70", +9°45'20"), sieved through a 1 mm sieve and placed in a total of 24 pots (20 cm i.d., 17 cm height) filled with 3.5 L sediment per pot. Ten days later, apical eelgrass shoots from Svenstrup Strand were collected randomly by harvesting turfs with intact ramets. Senescent leaves, rhizome parts older than 5 internodes and epiphytes were gently removed. Twenty-eight shoots were transplanted into each pot yielding a shoot density of 891 shoots m<sup>-2</sup> and placed into mesocosms filled with sea water from Svenstrup Strand. Ten shoots of each replicate were marked to estimate leaf growth, as described by Sand-Jensen <sup>1</sup>. Salinity and temperature were kept constant at 14 and 15°C respectively and the water was constantly aerated. Illumination (Phillips SONT-T Agro 400W) was set to a diurnal cycle of 12:12h at a photonflux density of 550 μmol photons (PAR) m<sup>-2</sup> s<sup>-1</sup> at canopy level for the high-light treatment and to 100 μmol photons (PAR) m<sup>-2</sup> s<sup>-1</sup> at canopy level for the low light treatment respectively. Blue mussels were gathered from the Marine Biological Research Centre and twenty-eight blue mussels were added to half of the mesocosms (= 891 mussels m<sup>-2</sup>; 28 mussels per mesocosm in 12 mesocosm), creating 100% mussel cover. To support nutrition of the blue mussels 2 g dry d<sup>-1</sup> resuspended dried *Spirulina* sp. were continuously added to the mesocosms.

After 21 days of exposure the seagrasses in the 24 pots were randomly harvested. Macroscopic epiphytes were removed by hand, the plants were rinsed with deionized water separated into leaves, rhizome and roots (yielding 72 samples), followed by immediate transfer to perforated aluminum bags and snap freezing in liquid nitrogen. The handling was fast (<20 sec) to preserve metabolites. The 72 samples were lyophilized for 48h and homogenized in a ball mill before further processing and analysis for metabolites.

**Metabolite extraction** All solvents and tubes were pre cooled to -20 °C. Ten mg of lyophilized and homogenized plant material (leaf, rhizome and root) were extracted for 8 min on ice in 1mL methanol/water (5:1 [v/v]) spiked with 1 μg of <sup>13</sup>C<sub>6</sub>-Sorbitol and 1 μg or Reserpine per sample as internal standard, followed by centrifugation at 14,000 g for 4 min. The supernatants (900 μL) were transferred to a test tube and split in a ration of 1:7:1 for quality control (QC), LC-MS and GC-MS respectively, the QC aliquots of all samples were pooled, aliquoted in 700 μL portions LC-MS and 100 μL for GC-MS respectively. All extracts were dried overnight in a speed-vac. For LC-MS analysis the dried samples were resuspended in 100 μL LC-solvent A (0.1% formic acid in water) and for GC-MS analysis derivatised as described below.

**Metabolite profiling** Here we present data collected by five different analytical conditions for roots, rhizomes and leaves of *Z. marina* (1) RP-LC-MS ESI+; (2) RP-LC-MS ESI-; (3) HILIC-MS ESI+; (4) HILIC-MS ESI-; and (5) GC-MS (RP=Reverse phase, LC= Liquid chromatography, MS= Mass spectroscopy, ESI-/+= negative/positive ionization, HILIC=Hydrophobic interaction liquid chromatography, GC=Gas chromatography).

**LC-MS Q-TOF analysis** A 1290 quaternary UHPLC system (Agilent Technologies, Santa Clara, CA, USA) (equipped with a degaser, autosampler, a temperature controlled column module) and an Agilent 6530 quadropole-time of flight (Q-TOF) mass spectrometer (MS) with an ESI source (Agilent Technologies, Santa Clara, CA, USA) was used for metabolomics analysis. Separation of apolar metabolites was achieved by injecting 5 μl sample on reversed phase column (Agilent Zorbax EclipsePlus C18; 150x2.1 mm, 1.8μm) maintained at 40 °C. The mobile phase was a mixture of solvent A (0.1%

formic acid in water and solvent B (0.1% formic acid in acetonitrile). The gradient elution program at a flow rate of 0.4 ml/min was: held 97% A (0-1 min), 97-2% A (1-15 min), held at 2% A (15-19 min) and returned to 97% A (19-20 min) followed by an equilibration time of 5 min at 97% A. Polar metabolites were separated on a HILIC column (Merck SeQuant ZIC-pHILIC column; 150x2.1mm, 5  $\mu$ m) maintained at 40°C by injection of 3  $\mu$ L of sample. QC samples were injected every 8 samples to control for RT drift and ionization patterns. The mobile phase was a mixture of solvent A (0.1% formic acid in water and solvent B (0.1% formic acid in acetonitrile). The gradient elution program at a flow rate of 0.3 ml/min was: held at 20% A (0-1) min, 20-80% A (1-15 min), held at 80% A (15-20 min) and returned to 20% A (20-21.5 min) followed by an equilibration time of 5 min at 20% A. MS-data was collected in full scan modus at 3 scans/s and a mass range of 50 – 1200 m/z in extended dynamic range mode.

ESI source settings were: VCap 3500 V, skimmer 65 V, fragmentor 165 V, nebulizer 40 psig, nitrogen gas flow 8 L/min at 250 °C. MS-data was collected at 3 scans/s and a mass range of 50 – 1200 m/z in the extended dynamic range mode (2GHz) and in positive and negative ionization. Initial tuning and auto-calibration (to two reference masses 121.050873 and 922.009798) was achieved to meet a mass accuracy of < 1 ppm before analysis.

**Data processing of LC-MS data** Data were collected and examined using Agilent MassHunter (MH) B7.02 (Agilent Technologies, Santa Clara, CA, USA) and deconvoluted, aligned, cleaned for back ground noise and unrelated ions in Agilent Profinder B6.0 (Agilent Technologies, Santa Clara, CA, USA) by batch recursive feature extraction an untargeted data-analysis algorithm. Agilent Mass Profiler Professional 13 (MPP) (Agilent Technologies, Santa Clara, CA, USA) was used for statistical analysis and metabolite annotation. The metabolites were annotated as MZ@RT on MSI level 4<sup>2</sup>.

**GC-MS Q-TOF analysis** The dried samples (100  $\mu$ L) were derivatised by adding 20  $\mu$ L of methoxyamine hydrochloride (40 mg mL<sup>-1</sup>) at 30 °C for 90 min followed by 30 min at 37°C in 80  $\mu$ L MSTFA (spiked with 5  $\mu$ L myristic-d<sub>27</sub> acid (0.75 mg mL<sup>-1</sup>) and 5  $\mu$ L FAME mix (0.75 mg mL<sup>-1</sup>) into 1 mL MSTFA for retention time locking respectively indexing). The metabolites were separated on Agilent 7890B gas chromatograph equipped with a DB5-MS Ultra-inert column (30 m, 0.25 mm, 0.25  $\mu$ m) (Agilent Technologies, Santa Clara, CA, USA) coupled to an Agilent 7200 GC-QTOF-MS (Agilent Technologies, Santa Clara, CA, USA) after injecting 1  $\mu$ L in split 1:10 mode. The GC temperature gradient was at 60 °C for 1 min, followed by a ramp of 10 °C per min to 325 °C held for 10 min. The TOF acquisition rate was set to 10 spectra/s in the extended dynamic range mode (2GHz). QC samples were injected every 8 samples to control for RT drift and ionization patterns.

**Data processing of GC-MS data** Data were collected using MassHunter Data Acquisition B7.02, examined in MassHunter qual B7.02. The deconvolution was achieved in Masshunter Unknown analysis B7.0 (UA) (Agilent Technologies, Santa Clara, CA, USA). The peak alignment, normalization and metabolite annotation was done in MPP 13. Analytes were considered as putatively annotated (MSI level 2, after Sumner et al. 2007) by matching the deconvoluted and aligned mass spectra against an in house library as well as the Fiehn-lib<sup>3</sup> (match factor >80) and annotation was further supported by manual comparison of retention indices.

**General data analysis** Peak areas were standardized for sample weight and to the internal standard, and later log<sub>2</sub>(x+1) transformed and baselined by unit scaling (mean-centered and divided by standard deviation of each variable) and log<sub>2</sub>(x+1) transformed. To exclude false positive hits only entities that showed a coefficient of variation (CV) of <35% and were present in at least 80% of the QC samples were

used for analysis. These stringent filters kept the number of false positive entities low, but might also have led to an increase in the number of false negatives.

The effects of light availability and species interaction were compared in MPP using univariate and multivariate methods. A cut-off value of  $p < 0.05$  was considered as significant in the two-way ANOVA (tukey post-hoc test) applying a Benjamini Hochberg FDR procedure, regarding an adjusted  $p$  value  $< 0.05$  as significant. To identify the most influential metabolites in separating the treatment groups along the principal components (PC) the CC-plots (Covariance vs. Correlation) of all 3 components were inspected<sup>4</sup>. The CC-plot combines the covariance and correlation loading profiles resulting from the PCA in a scatter plot. In this plot both magnitude (covariance) and reliability (correlation) are visualized. The P-Cov axis describes the magnitude of each variable in the data matrix X. The P-Cor axis represents the reliability of each variable in X. P-Cor axis always spans between  $\pm 1$  as the correlation has a theoretical minimum of -1 and a maximum of +1<sup>4</sup>. An alpha value of 0.05 was applied consistently.

**Ceramide and SP1 measurements** Ceramide was assessed as ceramide (validated as d18:1/12:0 with a mass of 481.4495)<sup>5</sup> and sphingosine-1-phosphate with a mass of 379.2488 by RP-LC-MS as described above. We confirmed the annotation of ceramide and S1P by comparison with standards purchased from Avanti Polar Lipids Inc. (Alabaster, AL, USA).

## References

1. Sand-Jensen, K., Biomass, net production and growth dynamics in an eelgrass (*Zostera marina* L) population in Vellerup Vig, Denmark. *Ophelia* **1975**, *14*, 185-201,
2. Sumner, L. W.; Amberg, A.; Barrett, D.; Beale, M. H.; Beger, R.; Daykin, C. A.; Fan, T. W.; Fiehn, O.; Goodacre, R.; Griffin, J. L.; Hankemeier, T.; Hardy, N.; Harnly, J.; Higashi, R.; Kopka, J.; Lane, A. N.; Lindon, J. C.; Marriott, P.; Nicholls, A. W.; Reily, M. D.; Thaden, J. J.; Viant, M. R., Proposed minimum reporting standards for chemical analysis Chemical Analysis Working Group (CAWG) Metabolomics Standards Initiative (MSI). *Metabolomics* **2007**, *3*, (3), 211-221, <http://dx.doi.org/10.1007/s11306-007-0082-2>
3. Kind, T.; Wohlgemuth, G.; Lee, D. Y.; Lu, Y.; Palazoglu, M.; Shahbaz, S.; Fiehn, O., FiehnLib: Mass Spectral and Retention Index Libraries for Metabolomics Based on Quadrupole and Time-of-Flight Gas Chromatography/Mass Spectrometry. *Anal Chem* **2009**, *81*, (24), 10038-10048, <http://dx.doi.org/10.1021/ac9019522>
4. Wiklund, S.; Johansson, E.; Sjöström, L.; Mellerowicz, E. J.; Edlund, U.; Shockcor, J. P.; Gottfries, J.; Moritz, T.; Trygg, J., Visualization of GC/TOF-MS-Based Metabolomics Data for Identification of Biochemically Interesting Compounds Using OPLS Class Models. *Anal Chem* **2008**, *80*, (1), 115-122, <http://dx.doi.org/10.1021/ac0713510>
5. Markham, J. E.; Jaworski, J. G., Rapid measurement of sphingolipids from *Arabidopsis thaliana* by reversed-phase high-performance liquid chromatography coupled to electrospray ionization tandem mass spectrometry. *Rapid Commun Mass Spectrom* **2007**, *21*, (7), 1304-14, <http://dx.doi.org/10.1002/rcm.2962>
6. Castorani, M. C. N.; Glud, R. N.; Hasler-Sheetal, H.; Holmer, M., Light indirectly mediates bivalve habitat modification and impacts on seagrass. *J Exp Mar Biol Ecol* **2015**, *472*, 41-53, <http://dx.doi.org/10.1016/j.jembe.2015.07.001>

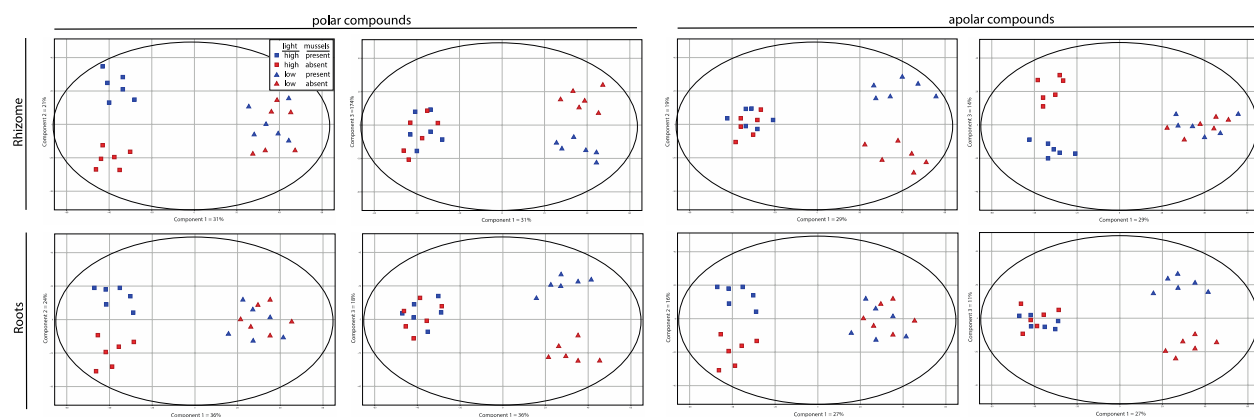

Figure S1. PCA plots of polar (two left panels) and apolar (two right panels) compounds in *Zostera marina* rhizomes (upper row) and roots (lower row), exposed to varying light and mussels. The first and third column indicates PC1 vs PC2 and the second column indicate P1 vs PC3. Squares indicate samples under high light intensities and triangles samples under low light intensities; blue colored samples indicate mussel presence and red colored samples indicate mussel absence. Only metabolites that passed the quality control filters are included.

Table S1: List of all putatively annotated metabolites (MSI level 2, after Sumner et al. 2007) reproducibly detected in all tissues and conditions by GC-QTOF-MS. Metabolites indicated as MZ@RT were not annotated, but kept for analysis. The significant results ( $p < 0.05$ ) of the 2-way ANOVA with a Bonferroni correction for multiple comparisons are indicated in bold. Pearson correlations between each metabolites and elemental sulfur ( $S^0$ ) correlations  $< 0.6$  are shown in red for negative correlations and green for positive correlations  $> 0.6$  respectively. The up or down regulation of a specific metabolites between each treatment is indicated by up or down. H, high light; L, low light; +, mussel presence; -, mussel absence;

| Source of variation  | ANOVA p-value |        |       | Spearman R<br>$S^0$ | Regulation |          |          |          |          |          |
|----------------------|---------------|--------|-------|---------------------|------------|----------|----------|----------|----------|----------|
|                      | Light         | Mussel | L x M |                     | H- vs H+   | H- vs L- | H- vs L+ | H+ vs L- | H+ vs L+ | H- vs L+ |
| Metabolite           |               |        |       |                     |            |          |          |          |          |          |
| 75.03@6.66           | 0.228         | 0.875  | 0.836 | -0.57               | down       | down     | down     | down     | down     | up       |
| 140.0315@6.68        | 0.895         | 0.718  | 0.999 | -0.07               | down       | down     | down     | up       | down     | down     |
| 167.0359@6.88        | 0.726         | 0.875  | 0.999 | -0.18               | down       | down     | down     | up       | down     | down     |
| 207.0325@7.1         | 0.646         | 0.875  | 0.897 | 0.64                | down       | down     | down     | up       | up       | up       |
| hydroxypyridine      | 0.640         | 0.875  | 0.849 | 0.84                | down       | down     | down     | up       | up       | down     |
| 207.0334@7.32        | 0.246         | 0.756  | 0.649 | 0.82                | down       | down     | up       | up       | up       | up       |
| lactic acid          | 0.560         | 0.305  | 0.405 | 0.87                | up         | down     | up       | down     | up       | up       |
| 234.1041@7.48        | 0.426         | 0.875  | 0.999 | -0.13               | down       | down     | down     | down     | down     | down     |
| 89.0327@7.54         | 0.014         | 0.531  | 0.897 | 0.55                | up         | down     | down     | down     | down     | up       |
| 73.0472@7.63         | 0.796         | 0.664  | 0.914 | -0.14               | down       | down     | down     | up       | up       | down     |
| L-alanine            | <.001         | 0.973  | 0.999 | 0.89                | up         | down     | down     | down     | down     | up       |
| acetohydroxamic acid | 0.383         | 0.875  | 0.649 | 0.76                | down       | down     | up       | up       | up       | up       |
| oxalic acid          | 0.335         | 0.973  | 0.999 | 0.45                | up         | down     | down     | down     | down     | up       |
| 281.0515@8.83        | 0.446         | 0.875  | 0.897 | 0.59                | up         | down     | down     | down     | down     | down     |
| 97.1011@9.23         | 0.646         | 0.875  | 0.836 | 0.84                | down       | down     | up       | up       | up       | up       |
| 147.0661@9.30        | 0.495         | 0.745  | 0.649 | 0.45                | up         | up       | down     | up       | down     | down     |
| L-valine             | <.001         | 0.875  | 0.649 | 0.88                | up         | down     | down     | down     | down     | down     |
| 147.0661@9.77        | 0.243         | 0.875  | 0.913 | 0.18                | up         | down     | down     | down     | down     | down     |
| urea                 | 0.009         | 0.902  | 0.836 | 0.86                | up         | down     | down     | down     | down     | down     |
| 299.0739@10.18       | 0.495         | 0.910  | 0.999 | -0.22               | down       | down     | down     | down     | down     | down     |
| ethanolamine         | 0.030         | 0.875  | 0.656 | 0.81                | down       | up       | up       | up       | up       | up       |
| phosphoric acid      | 0.139         | 0.875  | 0.999 | 0.79                | down       | up       | up       | up       | up       | down     |
| 147.0664@10.38       | 0.020         | 0.864  | 0.999 | -0.42               | down       | up       | up       | up       | up       | down     |

|                                |       |       |       |       |      |      |      |      |      |      |
|--------------------------------|-------|-------|-------|-------|------|------|------|------|------|------|
| 73.0472@10.42                  | 0.446 | 0.875 | 0.999 | 0.8   | down | down | down | up   | down | down |
| DL-isoleucine                  | <.001 | 0.745 | 0.649 | 0.91  | up   | down | down | down | down | down |
| 142.1054@10.71                 | 0.396 | 0.984 | 0.999 | 0.27  | up   | down | down | down | down | down |
| L-proline                      | <.001 | 0.539 | 0.649 | -0.99 | up   | up   | up   | up   | up   | up   |
| glycine                        | 0.009 | 0.973 | 0.999 | 0.75  | down | up   | up   | up   | up   | down |
| succinic acid                  | 0.230 | 0.875 | 0.938 | 0.13  | up   | down | down | down | down | up   |
| glyceric acid                  | 0.979 | 0.875 | 0.649 | -0.52 | up   | up   | down | up   | down | down |
| glyoxylic acid                 | 0.484 | 0.892 | 0.649 | 0.77  | down | down | down | down | up   | up   |
| fumaric acid                   | 0.085 | 0.539 | 0.296 | 0.8   | up   | up   | up   | up   | down | down |
| L-serine 2                     | 0.075 | 0.718 | 0.683 | 0.72  | down | up   | up   | up   | up   | down |
| 156.1205@11.70                 | <.001 | 0.125 | 0.175 | 0.82  | down | down | down | down | down | down |
| L-threonine                    | 0.414 | 0.875 | 0.897 | 0.02  | down | down | down | down | down | down |
| NA sulfamate                   | 0.016 | 0.944 | 0.999 | 0.76  | up   | up   | up   | up   | up   | down |
| 228.066@12.38                  | 0.321 | 0.875 | 0.961 | 0.79  | down | down | down | down | down | down |
| 147.0661@12.77                 | 0.076 | 0.951 | 0.999 | 0.09  | up   | down | down | down | down | up   |
| 155.1003@13.05                 | 0.224 | 0.875 | 0.649 | 0.84  | up   | up   | down | down | down | down |
| D-malic acid                   | 0.454 | 0.973 | 0.999 | -0.04 | down | down | down | down | down | up   |
| 73.0472@13.2                   | 0.230 | 0.539 | 0.999 | 0.85  | up   | up   | up   | down | up   | up   |
| 100.0573@13.44                 | 0.228 | 0.059 | 0.982 | 0.29  | down | down | down | up   | down | down |
| 156.0846@13.45                 | 0.530 | 0.875 | 0.897 | 0.42  | up   | down | down | down | down | up   |
| 232.1195@13.55                 | 0.102 | 0.951 | 0.649 | -0.99 | up   | down | down | down | down | down |
| aspartic acid                  | 0.230 | 0.913 | 0.836 | 0.86  | up   | down | down | down | down | down |
| L-glutamic acid                | 0.414 | 0.539 | 0.982 | -0.8  | up   | down | up   | down | down | up   |
| L-pyroglutamic acid            | 0.351 | 0.539 | 0.405 | 0.86  | down | down | up   | down | up   | up   |
| gamma-aminobutyric acid (GABA) | <.001 | 0.875 | 0.649 | 0.88  | up   | down | down | down | down | down |
| butantriol                     | 0.875 | 0.910 | 0.999 | 0.86  | up   | up   | up   | down | up   | up   |
| threonic acid                  | 0.129 | 0.875 | 0.740 | 0.87  | up   | down | down | down | down | down |
| 2-isopropylmalic acid          | 0.626 | 0.539 | 0.296 | -0.09 | down | down | up   | down | up   | up   |
| 100.0578@14.32                 | 0.559 | 0.801 | 0.786 | 0.68  | down | up   | down | up   | down | down |
| 146.0821@14.77                 | <.001 | 0.875 | 0.897 | 0.82  | down | down | down | down | down | down |
| 246.1346@14.82                 | 0.560 | 0.875 | 0.897 | 0.43  | up   | down | up   | down | down | up   |
| L-phenylalanine                | 0.521 | 0.875 | 0.897 | 0.57  | up   | down | down | down | down | up   |

|                           |       |       |       |       |      |      |      |      |      |      |
|---------------------------|-------|-------|-------|-------|------|------|------|------|------|------|
| 147.0661@15.07            | 0.646 | 0.745 | 0.740 | 0.35  | down | up   | down | up   | down | down |
| 73.0472@15.32             | 0.230 | 0.913 | 0.649 | 0.82  | down | down | down | down | down | up   |
| L-asparagine              | 0.171 | 0.875 | 0.897 | 0.72  | up   | down | down | down | down | down |
| xylose                    | <.001 | 0.875 | 0.897 | 0.79  | down | up   | up   | up   | up   | down |
| 243.1272@15.59            | 0.230 | 0.875 | 0.740 | 0.84  | down | down | down | down | down | up   |
| xylitol                   | 0.007 | 0.973 | 0.999 | 0.83  | up   | down | down | down | down | down |
| 73.0472@15.71             | 0.036 | 0.875 | 0.740 | 0.87  | down | down | down | down | down | up   |
| 156.0849@15.80            | 0.169 | 0.127 | 0.897 | 0.65  | down | down | down | up   | down | down |
| 97.1011@15.89             | 0.646 | 0.875 | 0.961 | 0.84  | up   | down | down | down | down | up   |
| 217.1072@15.91            | 0.406 | 0.913 | 0.999 | 0.01  | down | down | down | down | down | down |
| ribitol                   | <.001 | 0.973 | 0.999 | 0.81  | up   | up   | up   | up   | up   | down |
| Glutamine                 | 0.084 | 0.973 | 0.649 | 0.85  | up   | down | down | down | down | down |
| 73.047@16.18              | 0.448 | 0.992 | 0.999 | 0.24  | up   | down | down | down | down | down |
| 179.0529@16.26            | <.001 | <.001 | <.001 | 1     | down | down | down | down | down | down |
| glycerol 1-phosphate      | 0.206 | 0.875 | 0.999 | 0.78  | up   | up   | up   | up   | up   | up   |
| 73.047@16.47              | 0.171 | 0.875 | 0.849 | -0.1  | up   | down | down | down | down | down |
| 156.0846@16.57            | 0.394 | 0.913 | 0.999 | 0.03  | down | down | down | down | down | down |
| L-glutamine               | 0.307 | 0.929 | 0.836 | 0.88  | up   | down | down | down | down | down |
| 205.1083@16.64            | 0.335 | 0.586 | 0.649 | 0.75  | down | up   | down | up   | down | down |
| 204.1@16.89               | 0.462 | 0.539 | 0.836 | -0.13 | down | up   | down | up   | down | down |
| citric acid               | 0.127 | 0.180 | 0.296 | 0.31  | up   | down | up   | down | up   | up   |
| 225.0935@17.12            | 0.979 | 0.875 | 0.649 | -0.32 | down | down | up   | down | up   | up   |
| Hexadecanal               | 0.285 | 0.756 | 0.649 | 0.81  | down | down | up   | up   | up   | up   |
| myristic acid             | 0.089 | 0.973 | 0.836 | 0.88  | down | down | down | down | down | up   |
| tagatose 1                | <.001 | 0.003 | 0.011 | 0.73  | up   | up   | up   | up   | up   | up   |
| 149.0236@17.61            | 0.016 | 0.973 | 0.999 | -0.64 | down | down | down | down | down | down |
| adenine                   | <.001 | 0.539 | 0.961 | 0.79  | up   | up   | up   | up   | up   | up   |
| 73.047@17.71              | 0.081 | 0.875 | 0.836 | 0.08  | down | up   | up   | up   | up   | up   |
| allantoin                 | <.001 | 0.944 | 0.897 | 0.85  | down | down | down | down | down | up   |
| D-glucose                 | <.001 | 0.226 | 0.649 | 0.81  | up   | up   | up   | up   | up   | up   |
| hydroxyphenyl lactic acid | 0.094 | 0.557 | 0.999 | 0.76  | up   | up   | up   | up   | up   | up   |
| D-sorbitol                | 0.426 | 0.875 | 0.897 | 0.45  | up   | down | down | down | down | down |



|                               |       |       |       |       |      |      |      |      |      |      |
|-------------------------------|-------|-------|-------|-------|------|------|------|------|------|------|
| D (+) galactose               | 0.005 | 0.531 | 0.782 | 0.77  | up   | up   | up   | up   | up   | up   |
| D-mannitol                    | 0.168 | 0.539 | 0.649 | 0.02  | up   | down | down | down | down | up   |
| D-sorbitol                    | 0.029 | 0.973 | 0.999 | -0.09 | up   | up   | up   | up   | up   | up   |
| galactitol                    | 0.285 | 0.973 | 0.999 | -0.01 | up   | down | down | down | down | down |
| hydroxycinnamic acid          | 0.011 | 0.875 | 0.908 | 0.76  | down | up   | up   | up   | up   | down |
| NA Inositol                   | 0.002 | 0.942 | 0.740 | 0.5   | up   | down | down | down | down | down |
| gluconic acid                 | 0.009 | 0.875 | 0.897 | -0.8  | up   | down | down | down | down | down |
| Mannose                       | 0.707 | 0.910 | 0.649 | -0.09 | up   | up   | up   | up   | down | down |
| 73.047@18.81                  | 0.524 | 0.989 | 0.649 | 0.8   | up   | up   | down | down | down | down |
| mucic acid                    | 0.009 | 0.875 | 0.897 | 0.87  | up   | down | down | down | down | up   |
| NA Inositol                   | 0.377 | 0.875 | 0.897 | 0.62  | up   | down | down | down | down | up   |
| Chizo-Inositol                | 0.560 | 0.892 | 0.897 | -0.13 | up   | down | down | down | down | down |
| 313.3062@19.37                | 0.446 | 0.531 | 0.740 | 0.59  | down | up   | down | up   | down | down |
| palmitic acid                 | 0.524 | 0.539 | 0.999 | 0.82  | up   | down | up   | down | down | up   |
| dihydroxyphenylalanine (DOPA) | 0.407 | 0.875 | 0.405 | 0.3   | up   | up   | down | down | down | down |
| 355.0705@19.56                | 0.322 | 0.875 | 0.897 | -0.08 | down | down | down | down | down | down |
| myo-inositol                  | 0.079 | 0.951 | 0.999 | 0.84  | up   | up   | up   | up   | up   | up   |
| galactose oxime hexakis       | 0.313 | 0.875 | 0.649 | 0.25  | up   | up   | up   | up   | down | down |
| caffeic acid                  | 0.167 | 0.610 | 0.897 | 0.88  | up   | down | down | down | down | up   |
| phytol                        | 0.886 | 0.233 | 0.982 | 0.82  | up   | down | up   | down | up   | up   |
| linoleic acid                 | 0.063 | 0.875 | 0.649 | 0.84  | up   | down | down | down | down | down |
| octadecatrienoic acid         | 0.097 | 0.745 | 0.849 | 0.84  | up   | up   | up   | up   | up   | up   |
| stearic acid                  | 0.640 | 0.718 | 0.897 | 0.86  | up   | up   | up   | down | up   | up   |
| 73.047@21.39                  | 0.006 | 0.973 | 0.897 | 0.83  | up   | down | down | down | down | down |
| 204.1003@21.69                | 0.020 | 0.875 | 0.836 | 0.84  | down | down | down | down | down | up   |
| 73.0472@21.87                 | 0.446 | 0.539 | 0.897 | 0.8   | up   | up   | up   | down | up   | up   |
| 73.0472@21.91                 | 0.600 | 0.943 | 0.649 | -0.05 | up   | up   | down | down | down | down |
| 73.047@22.58                  | 0.020 | 0.992 | 0.999 | -0.19 | up   | up   | up   | up   | up   | down |
| 73.0472@22.73                 | 0.859 | 0.967 | 0.649 | 0.26  | up   | up   | up   | up   | down | down |
| 430.177@22.83                 | 0.089 | 0.305 | 0.999 | -0.58 | up   | up   | up   | down | up   | up   |
| 73.047@22.86                  | 0.024 | 0.875 | 0.836 | 0.01  | up   | up   | up   | up   | up   | up   |
| 73.0472@23.14                 | 0.109 | 0.875 | 0.961 | -0.29 | down | down | down | down | down | down |

|                       |       |       |       |       |      |      |      |      |      |      |
|-----------------------|-------|-------|-------|-------|------|------|------|------|------|------|
| lactobionic acid      | <.001 | 0.875 | 0.740 | 0.72  | up   | up   | up   | up   | up   | down |
| hexadecanoic acid     | 0.462 | 0.875 | 0.897 | -0.16 | down | down | down | down | down | down |
| eicosapentaenoic acid | 0.168 | 0.875 | 0.999 | -1    | down | down | down | down | down | down |
| kestose               | 0.626 | 0.539 | 0.897 | -0.89 | up   | up   | up   | down | up   | up   |
| NA Disacaride         | 0.009 | 0.875 | 0.649 | 0.22  | up   | down | down | down | down | down |
| sucrose               | <.001 | 0.125 | 0.175 | -0.94 | up   | up   | up   | up   | up   | up   |
| eicosapentaenoic acid | 0.322 | 0.875 | 0.836 | 0.65  | up   | down | down | down | down | down |
| 73.047@25.32          | 0.061 | 0.875 | 0.897 | 0.11  | up   | up   | up   | up   | up   | up   |
| 73.047@25.80          | 0.224 | 0.875 | 0.897 | 0.32  | up   | down | down | down | down | down |
| tetracosanoic acid    | 0.232 | 0.557 | 0.649 | 0.86  | up   | down | up   | down | down | up   |
| 204.1007@26.81        | 0.892 | 0.729 | 0.740 | 0.08  | up   | down | up   | down | up   | up   |
| alpha tocophereol     | 0.600 | 0.875 | 0.740 | 0.83  | up   | up   | up   | down | down | down |
| 73.0472@28.06         | 0.859 | 0.875 | 0.358 | 0.79  | up   | up   | up   | down | down | down |
| caffeic acid          | <.001 | 0.059 | 0.649 | 0.77  | up   | up   | up   | up   | up   | up   |
| 443.135@28.59         | 0.006 | 0.875 | 0.662 | -0.27 | up   | up   | up   | up   | up   | down |
| 501.1581@28.68        | <.001 | 0.875 | 0.897 | 0.56  | down | up   | up   | up   | up   | down |
| 501.158@28.93         | <.001 | 0.875 | 0.739 | -0.37 | up   | up   | up   | up   | up   | down |
| 559.182@28.96         | <.001 | 0.875 | 0.897 | 0.54  | down | up   | up   | up   | up   | down |
| 83.0852@29.08         | <.001 | 0.875 | 0.897 | 0.53  | up   | down | down | down | down | down |
| beta-sitosterol       | 0.079 | 0.875 | 0.649 | 0.8   | up   | down | down | down | down | down |
| 296.25@29.72          | <.001 | 0.875 | 0.999 | 0.64  | up   | up   | up   | up   | up   | up   |
| rosmarinic acid       | 0.035 | 0.875 | 0.836 | -0.43 | up   | up   | up   | up   | up   | up   |
| 647.4216@31.80        | 0.610 | 0.352 | 0.999 | 0.12  | up   | up   | up   | down | up   | up   |

---

NA indicates metabolites that belong to a certain compound class but could not be annotated as a specific metabolite.

Table S2: Elemental sulfur ( $S^0$ ) and pore water ammonium levels for *Z. marina* as a function of light and mussel treatment.

| Light treatment                           | High light                    |                                | Low light                       |                                 |
|-------------------------------------------|-------------------------------|--------------------------------|---------------------------------|---------------------------------|
| Mussel treatment                          | Absent                        | Present                        | Absent                          | Present                         |
| Response variable                         |                               |                                |                                 |                                 |
| Root $S^0$ ( $\mu\text{mol S gDW}^{-1}$ ) | 0 <sup>B,b</sup>              | 3.54 $\pm$ 1.34 <sup>B,a</sup> | 6.80 $\pm$ 2.28 <sup>A,b</sup>  | 17.95 $\pm$ 6.16 <sup>A,a</sup> |
| Pore water nutrients                      |                               |                                |                                 |                                 |
| Ammonium ( $\mu\text{mol l}^{-1}$ )       | 632.4 $\pm$ 71.2 <sup>2</sup> | 1279.7 $\pm$ 51.9 <sup>1</sup> | 1218.2 $\pm$ 107.4 <sup>1</sup> | 1320.2 $\pm$ 163.1 <sup>1</sup> |

Data are represented as mean ( $\pm$ SEM). Levels not connected by the same letter indicate significant differences (ANOVA-Tukey Post Hoc <0.05). Capital letters indicate light dependent differences, lower case letters indicate mussel dependent differences; uppercase numbers indicate interaction effects; data from Castorani et al.<sup>6</sup>

Table S3: Results of 2-way ANOVA testing the effects of light and mussels on seagrass performance, nutrients, sediment biogeochemical and production and respiration.

| Source of variation                          | Light |         |        | Mussels |        |       | Light x mussels |       |       |
|----------------------------------------------|-------|---------|--------|---------|--------|-------|-----------------|-------|-------|
| Response variable                            | df    | F       | p      | df      | F      | p     | df              | F     | p     |
| Seagrass survival, growth, and energy stores |       |         |        |         |        |       |                 |       |       |
| Total shoot density                          | 1,20  | 139.401 | <0.001 | 1,20    | 1.024  | 0.324 | 1,20            | 0     | 1     |
| Terminal shoot density                       | 1,20  | 99.011  | <0.001 | 1,20    | 0.309  | 0.584 | 1,20            | 1.104 | 0.306 |
| Lateral shoot density                        | 1,20  | 198.416 | <0.001 | 1,20    | 0.218  | 0.646 | 1,20            | 1.422 | 0.247 |
| Leaf growth rate                             | 1,20  | 211.888 | <0.001 | 1,20    | 2.235  | 0.151 | 1,20            | 0.553 | 0.466 |
| Rhizome soluble sugars                       | 1,20  | 218.559 | <0.001 | 1,20    | 0.059  | 0.81  | 1,20            | 0.383 | 0.543 |
| Rhizome starches                             | 1,20  | 0.391   | 0.539  | 1,20    | 0.018  | 0.895 | 1,20            | 0.001 | 0.999 |
| Root elemental sulfur                        | 1,20  | 18.853  | <0.001 | 1,20    | 6.444  | 0.02  | 1,20            | 0.598 | 0.448 |
| Seagrass nutrient condition                  |       |         |        |         |        |       |                 |       |       |
| Leaf percent carbon                          | 1,20  | 7.693   | 0.012  | 1,20    | 1.196  | 0.287 | 1,20            | 0.574 | 0.458 |
| Leaf percent nitrogen                        | 1,20  | 119.71  | <0.001 | 1,20    | 1.513  | 0.233 | 1,20            | 0.757 | 0.395 |
| Leaf carbon:nitrogen                         | 1,20  | 201.834 | <0.001 | 1,20    | 1.21   | 0.284 | 1,20            | 0.597 | 0.449 |
| Sediment biochemical conditions              |       |         |        |         |        |       |                 |       |       |
| Porewater ammonium                           | 1,20  | 8.542   | 0.008  | 1,20    | 12.231 | 0.002 | 1,20            | 6.48  | 0.019 |
| Porewater dissolved organic carbon           | 1,19  | 2.469   | 0.133  | 1,19    | 0.822  | 0.376 | 1,19            | 0.096 | 0.761 |
| Sediment acid-volatile sulfides              | 1,19  | 1.097   | 0.308  | 1,19    | 10.234 | 0.005 | 1,19            | 1.419 | 0.248 |

P values <0.05 are shown in bold; data from Castorani et al.
